# Supplementary material for: Characterization of new IS elements and studies of their dispersion in two subspecies of Leifsonia xyli
Source: PubMed Central journal article supplement (PMC2516522; doi:10.1186/1471-2180-8-127), 2008-07-25
Supplement: 1471-2180-8-127-S1.pdf [file 1471-2180-8-127-S1.pdf]

**Additional file 1 - Comparative analysis of *Lxc*-IS elements and the most related IS element of *Lxx* genome.**

| <i>Lxc</i> -IS<br>(GenBank<br>ID) | Most<br>related<br><i>Lxx</i> -IS | Percentage of<br>identity/similarity with <i>Lxx</i><br>IS elements |                                        |
|-----------------------------------|-----------------------------------|---------------------------------------------------------------------|----------------------------------------|
|                                   |                                   | Nucleotides <sup>a</sup><br>(whole element)                         | Amino acids <sup>b</sup><br>(ORF only) |
| <i>IS1237</i><br>(X75973)         | <i>ISLxx6</i>                     | 85%                                                                 | 78%                                    |
| <i>ISLxc1</i><br>(DQ191803)       | <i>ISLxx3</i>                     | 71%                                                                 | 75%                                    |
| <i>ISLxc2</i><br>(EF176596)       | <i>ISLxx4</i>                     | 70%                                                                 | 63%                                    |
| <i>ISLxc3</i><br>(EF421582)       | <i>ISLxx5</i>                     | 71%                                                                 | 69%                                    |
| <i>ISLxc4</i><br>(EF433175)       | <i>ISLxx5</i>                     | 57%                                                                 | 52%                                    |

<sup>a</sup> Nucleotides sequences were aligned across their entire length, from IR to IR (global alignment).

<sup>b</sup> Amino acid sequences were aligned using Blast2seq (local alignment) (<http://www.ncbi.nlm.nih.gov/blast/bl2seq/wblast2.cgi>)
