# Supplementary material for: Characterization of new IS elements and studies of their dispersion in two subspecies of Leifsonia xyli
Source: PubMed Central journal article supplement (PMC2516522; doi:10.1186/1471-2180-8-127), 2008-07-25
Supplement: 1471-2180-8-127-S2.pdf [file 1471-2180-8-127-S2.pdf]

**Additional file 2 - Characterization of IS elements of *Leifsonia xyli* subsp.**

*cynodontis*.

**IS1237**

(CGCGGCGGAACCGCATTTA)  
GAGGTTGGTTTCAGTAGTCGCGGTGGCGGGTGGTTGTTGTGGCTGGTTAGCGGGGATGCTGGTTCGAGTGTCCG  
ACGCTTGCTGAGGATCGGTTTCATTACGGATATGTTGTGGGAGCGGCTGGAGCCGTTGATTCCGCCTCGGC  
CGCTGTGGTCAATGGCGGGCTGGGCAGCCTCGGGTTCCTGACC GGAAGGTGTTTCGCTGGGATCGTGT  
CGTGTCTGCTGACGGGGATCCC GTG GAG AAG CTC CCG CCC GAG TTG GGG TAT GGG TCC  
M E K L P P E L G Y G S  
GGG GTC ACT TGT TGG CGG CGT CTG CGT GAA TGG TCC GAA GCG GGC GCG TGG  
G V T C W R R L R E W S E A G A W  
GAT GCA CTG CCG AAG ATC ATG CTC GAC GAA CTC GGC CAG GCT GGC ATG ATC  
D A L R K I M L D E L G Q A G M I  
GAC TGG TCA AGA ACC TGC CTG GAC TCC GTA AGT GTC CGG GCG AAA AGG GG  
D W S R T C L D S V S V R A K R G  
GGC GAT CTC ACT GGA CCT AAC CCC ACG GAT CGT GGG AAA CGG GGC ACC AAG  
G D L T G P N P T DR R G K R G T K  
TAC CAT GTC CTG ACC GAC CGC AAC GGA CTC CCG CTG CAT GTG GAG ATC TCC  
Y H V L T D R N G L P L H V E I S  
GGC GCC AAC CGA CAC GAC TCC ATG CTC GTG GAA CCT GTG TTA GAC AAC ATC  
G A N R H D S M L V E P V L D N I  
ACC GCG ATC AAG GGC GTC GGC CGC GGT CGG CCC AGA CGC CGC CCG GTT ATC  
T A I K G V G R G R P R R R P V I  
TTC CAC GCC GAT AAG GCT TAC GAC AAC CGC CGC GTC CGC TGT TAC CTG CGT  
F H A DK AY D N R R V R C Y L R  
TGT CGT GGG ATC AAG GCA CGC ATC GCA ATC GGA GTC GAC TCC AAA CAG  
C R G I K A R I A R I G V D S K Q  
TGA CTG GGT AAA CAC TGT TGG GTA GTC GAA CGC ACC ATG GCC TGG ATC CTC  
\* L G K H C W V V E R T M A W I L  
GCC TTC CGG AAA CTC GCC ACT CGC TAC GAC CGC ACC GCC TCA ACG ATC ACG  
A F R K L A T R Y D R T A S T I T  
GCG CTC GTC GCT CTA GCA ATC GCG ATC ACC AGC GCC CGC AAA CTC ACC AAA  
A L V A L A I A I T S A R K L T K  
AAC GAC TAC TGA AACCATCTC  
N D Y  
(TTATAGCAGAGCACGAAGAG)

**Sequence 1. IS1237 (899 bp version).** (a) In between parenthesis: adjacent sequences of one copy (4<sup>o</sup> occurrence – additional file 3); (b) letters highlighted in gray: DR; (c) letters highlighted in green and non complementary nucleotides highlighted in yellow: IR; (d) letters in red: transposase start and end; (e) letters beneath nucleotide sequence separated in triads: transposase coding sequence; (f) letters highlighted in brown: purine rich region possible associated with -1 frameshifting; (g) letters in boldface: missing sequence of IS1237d1 (798 bp); (h) letters in pink: premature stop codon; (i) letters within rectangles: DDE motif and conserved amino acids of IS5 family.

# ISLxc1+IS1237

(AGCAGCAGCTGGCGATCGCC)

**TGTCTGTGTC**ACTGTT**AGCGGGCTCCGGGTTGTCCGAGTTGTC**TGGCCCC**GGCG**GCGACTTGCCGGGCTG  
GTTGTGTCGAAGCTAA**GAGTGGTTTCAGTAGTCG**GCGTGGCGGTGGTTGTTGTGGCTGGTTAGCGGGGA  
TGCTGGTTCGAGTGTGACGCTTGTGAGGATCGGTT**CATTACGGATATGTTGTGGGAGCGGCTGGAGCCG**  
TTGATTCCGCCTCGGCCGCTGTGGTCAATGGCGGGCTGGGCAGCCTCGGGTTCCTGACCGGAAGGTGT  
TCGCTGGGATCGTGTTCGTGCTGCTGACGGGGATCCCGTGGAGAAGCTCCCGCCGAGTTGGGGTATGGG  
TCCGGGGTCACTTGTGGCGGCGTCTGCGTGAATGTTCCGAAGCGGGCGCGTGGGATGCACTGCGGAAGA  
TCATGCTCGACGAAC**TGCGCAGGCTGGCATGATCGACTGGTCAAGA**ACTGCC**TGGACTCCGTAAGT**GT  
CCGGGCGAAAAGGGGGGCGATCTCACTGGACCTAACCCACGGATCGTGGGAAACGGGGCACCAAGTACC  
ATGTCTGACCGACCGCAACGGACTCCCGCTGCATGTGGAGATCTCCGGCGCAACCGACACGACTCCAT  
GCTCGTGAACCTGTGTTAGACAACATCACC**CGCATCAAGGGCGT**CGGCCGCGGTGGGCCAGACCGCCG  
CCGTTATCTTCCACCGCGATAAGGCTTACGACAACCCCGCGTCCGCTGTTACCTGCGTTGTCGTGGGA  
TCAAGGCACGCATCGCACGAATCGGAGT**CGACTCCAAACAGT**ACTGGGTAAACACTGTTGGGTAGT**CGA**  
ACGCACCATGGCCTGGATCCTCGCCTTCCGAAACTCGCCACTCGCTACGACCGCACCGCCTCAACGATC  
ACGGCGCTCGT**CGCTCTAGCAATCGCGATCACCAGCGCCGCA**AACTCACC**AAAAA****CGACTACTGAAACC**  
**ATCTC**TAA**GTGGCCCCACCTGAGTGTGGTTCCCGTCTGTTACTT**CAGGATGGGAGGGCCCCGGGTTGGGGT  
CGAGGTTGGATCAGTTCGCTGCGATCAGGAGAGATGCCCGGGTGGAGGGTCTCTCTATTTCGTGAGCTTGC  
TGTTTCGTATGGTGTTCACCGGGCGGACGGTTTCGTAGGCTTTGGAGTCAGCGACGCCACCGTCCGCGAAG  
CCGAGAGTT**CAGTCGTCGCCAAGCTGGATCTGGTTCGCGAGCTGATCGACGCGATTCTGCGTCAGGATC**  
TCGGGGCGCCGAAGAAGCAGAAGCAGACGGCGACACGGATCTGGAAACGTCTCTCGATGAGCACCAGT  
CGATGTCTCTTCCACCGCAGTCCGCTGACTATGTGCGTCCCGGGCGCCGAGATCGACCGGAGGCGGT  
CGTCTGCCGGAGGTGTTCCGTC**CCCGCAGGAGCATGCTCCGGGGCGGAGGCGAGGTCGATTTCCGGT**GAGG  
TCTGGGTGATCCTGGCCGGGGTGAAGACCAAGTGCACATGTTCACTTTTCCGGCTCTCGTACTCGGGGAA  
GGCGATTACCGGGTCTACTCGACGCAGTCGCAAGAGGCGTTCTGGAAGGCCACATCGACGCGTTCGAG  
GAGATTGGCGGGATGCCGACCTTACATCAAATACGACAACCTGGCCCGCGGGTGAAGTCCGTGGTCA  
ACGGCAAGGACCGCAAACGGGTCGAGAATGACCGTTGGGTCTGTTCCGTTCCCACTACG**GATT**CGACGC  
GTTCTACTGCCAGCCCGGCATTGACGGTGCACGAGAGAGGGCGGGCGTTGAGGGCGAGGTCGGCCGGTTC  
CGCCGACGTTGGCTCTCACCATGCCCGAAGTCGACTCCCTCGCGCAACTGAACCGGATGATCCGCGCT  
GGGATGCCCGGTGACGAGCAGCGCCGGATCGCGCAGCGCCGAACCAAGTTCGAGGACGACTTCGCTACAGA  
ACGCCCCGCTCTTCCGGCGCTCGCGGCGGAGCGATTGATCCGGGACTGGTGTGCTGCATCTCGGGTCGAC  
CGGTCCGGGCTGATCAGCGTCCGGATGGCGAAATACCTGTCCCTGCCCGGCTCATCGGCCGTGAAGTCC  
GCGTCTCTCCGCGCTTCCGAGGTCGTGCTTTCGACGGGCGCGT**TGA**AGTCGCCCGGCACGAACCGGTGG  
TCGCCCGGGAGGCGAGTCGATCCAGCTGGATCACTACCTCGAGGTCCTCCGGCACAAGCCCGGCGCGTT  
CCCCGGCTCGACAGCACTTGCACGCGCCCGGAGGCGGGAACCTTACC**CGCCCA****TGA**AGCGTTC**TGG**  
CAGGAGGCAAGGAAAGTCAATGGCGACACGGCCGGCACCAGAGAGCTCGTGCAGCTGCTCCTGCTCCATC  
GCAGCATGCGCGCAGCCGACGTGATCGCCGGGATCCGCGCGGCACTCTCGGTCCGGGCCATCTCCGC**TGA**  
CGTCGTGCGGGT**TGA**AGCACGACTGTACGCAGGTGGGGCCATCCAACACCGACAGCCCGT**TGA**ACAACCG  
CCCGATCGCGAGCGACGAGTGTGCTAGTCTCACCAGCGCCGGCTCCGGGATCCGAGGCTGTCTATCGCCG  
GCCTGCCACAGGACAACCGCCCGTCCCGACCGTCA**CCCAATACGACGA**ACTCTCCAGCGCCCGCCCGT  
CTTACC**CGACCCACCACCGAT****TGAGAGAGAAGGA**ACCACCGACAC **ATG** AGC CCA ACC ACC ACG

M S P T T T  
AAC ATC ACC ACC ACC CTC CGC CGG CAA CGC GGG ATG ACC CAG GAA GCC GCC  
N I T T T L R R Q R G M T Q E A A  
GCG GCC GCC GTC GAC CAA GCC TGC AGA CGC CTG CGA CTA CCG ACC ATT CGC  
A A A V D Q A C R R L R L P T I R  
GCC GTG ATG GAC GAA GCG ATC CGG GTC GCC GAG CAC GAG CAG CTG TCC TAC  
A V M D E A I R V A E H E Q L S Y  
CAA GGC TTC CTC GCC GAA GTG CTG TTG GCC GAG TGC GAC GAC CGC GAC CGC  
Q G F L A E V L L A E C D D R D R  
CGC TCC ACC GTC CGC CGC GTC GCC TCC GCC GGC TTC CCA CGT CAG AAA TGG  
R S T V R R V A S A G F P R Q K W  
CTC GGC GAC TTC GAC TTC GAC ACC AAC CCG AAC ATC AAC GCG GCG ACC ATC  
L G D F D F D T N P N I N A A T I  
CAC ACG CTC GCC ACC GGC GAC TGG GTC AGA CGC GGC GAC CCG CTC TGC CTC  
H T L A T G D W V R R G D P L C L  
ATC GGG GAC TCC GGC ACC GGC AAG AGC CAC CTC CTC ATC GGC CTC GGC ACC  
I G D S G T G K S H L L I G L G T  
GCC GCA GCC GAG AAG GGC TAC CGA GTC AAA TAC ACC CTC GCG ACC AAG CTC  
A A A E K G Y R V K Y T L A T K L

GTG AAC GAA CTC GTC GAA GCA GCA GAT GAG AAG CAG TTG GCC CGC ACG ATC  
 V N E L V E A A D E K Q L A R T I  
 GCT CGC TAC GGC CGC GTC GAT CTG CTC TGC ATC GAC GAG CTC GGC TAC ATG  
 A R Y G R V D L L C I D E L G Y M  
 GAA CTC GAC CGA CGC GGC GCC GAG CTC CTC TTC CAA GTC CTC ACC GAA CGC  
 E L D R R G A E L L F Q V L T E R  
 GAA GAG AAG AAC TCC GTC GCG ATC GCA TCC AAC CAG TCA TTC TCG GGA TGG  
 E E K N S V A I A S N Q S F S G W  
 ACG GAC ACC TTC ACC GAC CCC AGG CTC TGC GCT GCC ATC ATC GAG ACC GGC  
 T D T F T D P R L C A A I I E T G  
 ACC ACC TCC TAC CGC CTC CAA CAC ACC CGC AAC ACC GCA CTC GCT GGG GCC  
 T T S Y R L Q H T R N T A L A G A  
 AAC TAA CTTCGACAACCCGGTCCCGCCAGCCTGACATAGTCA  
 N  
 (ATCGCCCGGCTCCGCGCCAT)

**Sequence 2. ISLxc1 (2,631 bp) and the ISI237 insertion represented in white letters highlighted in black.** (a) In between parenthesis: adjacent sequences of one copy (11<sup>o</sup> occurrence – additional file 3); (b) letters highlighted in gray: DR; (c) letters highlighted in green and non complementary nucleotides highlighted in yellow: IR; (d) letters in pink: premature stop codon of the disrupted *istA*; (e) letters in red: *istB* start and end; (f) letters beneath nucleotide sequence separated in triads: *IstB* coding sequence; (g) letters highlighted in brown: purine rich region.

# ISLxc2

(CTCGTCGCCGGGGTCTAGGT)  
**FTGTCCTGCTCAGGGACGTTGGT** TGAGGTGTGACGCGATAGATGGGTGAGGACCTCCCGGTCGAGAGTGGG  
 GCTGTCTAGTTTTCCCTGCACTCGATGACTTAGGAGGTCCCTC **GTG** ACC CAC GCT AAT GCT GCT  
M T H A N A A  
 TTG ACT CCT CGC GAA TGC CTC CGC CTG GCC CGC CAA GTC GTC GAC GAC GGC  
 L T P R E C L R L A R Q V V D D G  
 TGG TCC GTT GCT GCG GCG GCG ACC TAC TTC CGA GTG TCC **TGA** CGC ACC GCG  
 W S V A A A A T Y F R V S \* R T A  
 GAC CGA TGG GCT CGT CGT TAC GTG GAG ATG GGC GAG GCG GGA ATG CTG GAC  
 D R W A R R Y V E M G E A G M L D  
 CGT TCG TCA CCG CCG CAT CAC AGC CCG AAC AAG ACC CCG CGA AGA CTG GTC  
 R S S R P H H S P N K T P R R L V  
 CGC AAG GTC GTG CAT CTG CGG TGG AAG AAG CGG CTG GGA CCA GTC GGT ATC  
 R K V V H L R W K K R L G P V G I  
 GGC GCC CAG CTC GGC ATG CCC GCC TCG ACC GTT CAC ACG GTC CTC TCC CGG  
 G A Q L G M P A S T V H T V L S R  
 TGC CGG ATC AAT CGG CCC AGC CAC GTC GAC GTC CGC ACC GGC GAA CCC GCC  
 C R I N R P S H V D V R T G E P A  
 CGC CGC TAC GAG CAC GAG CAT CCC GGA TCG ATG ATC CAC GTC GAC ATC AAG  
 R R Y E H E H P G S M I **H** V **D** **T** **K**  
 AAA CTC GGC AAC ATC CCC GAC GGT GGC GGC TGG CGC TAC GTC GGA CGT CTC  
**K** L G N I P D G G G W R Y V G R L  
 CAG GGA GAG CGG AAC AAG GCC ATC ACC GCG AAG CGG ACC GGG AAA CAC GGG  
 Q G E R N K A I T A K R T G K H G  
 ATC ACC GGC GAC ATG ATC ACC GGC ACA GCG TTC GTT CAT ACC GTC ATC GAC  
 I T G D M I T G T A F V H T V I D  
 GAT CAC TCC CGT GTC GCT TAC GCC GAG ATC CAC GAC GAC GAA ACC GCC GCC  
 D H S R V A Y A E I H D D E T A A  
 ACT GCA ATC GCT GTT CTG CGT CGA GCG GTC GGC TGG TTC GCC AGC CGT GGC  
 T A I A V L R R A V G W F A S R G  
 GTC ACC GTC GAA CAG GTG CTC TCC AAC GGC TCC GCA TAC CGC TCA TAC  
 V T V E Q V **L** **S** **D** **N** **G** **S** **A** Y R S Y  
 GCC TGG CGC GAC GCT TGC GCC GAG CTC AGC ATC CAA CCG AAA CGC ACC CGG  
 A W R D A C A E L S I Q P K R T R  
 CCC TAC CAT CCG CAG ACG AAC GGC AAG ATC GAA CGC TTC CAC CGC ACC CTC  
 P Y H **F** **Q** **T** **N** **G** **K** I **E** **R** **F** H R T L  
 GCC GAC GGC TGG GCA TAC GCC CGG CAC TAC AAC TCC GAA TCA GCC CGC CGC  
 A D G W A Y A R H Y N S E S A R R  
 AAC GCA CTC CCG GCC TGG CTG CAC TCC TAC AAT CAC CAC AGG CCC CAC ACC  
 N A L P A W L H S Y N H H R P H T  
 GCC ATC GGC AGC CAG CCA CCC ATC AGC AGA TTG **ACC AAC GTC CCT GAG AAA**  
 A I G S Q P P I S R L T N V P E K  
**CAC A** (CC **TAG** AGCGGGACCTCCGCC)  
 H T

**Sequence 3. ISLxc2 (1,105 bp).** (a) In between parenthesis: adjacent sequences of one copy (5° occurrence – additional file 3); (b) letters highlighted in grey: DR; (c) letters highlighted in green and non complementary nucleotides highlighted in yellow: IR; (d) letters in orange: site of insertion of IS1237 (occurrences 17, 28 and 49); (e) letters in red: transposase start and end; (f) letters in pink: premature stop codon; (g) letters beneath nucleotide sequence separated in triads: transposase coding sequence; (h) letters within rectangles: DDE motif and other conserved amino acids of IS481 family.

# ISLxc3

(CCCGGCCAGTGCCGACGCAC)  
**CTTGGGTTCTAACGGTCGTGCAACA**CCTGGACTTTCTGGGAGTTGTAACGACCGTGGCCCGTTTAAGGA  
 GCTATTTCGAGGGATCGACGCTGTTTCACGCAGGCTGATAAAGGACGCGTTCCTCGCGTTGTTTCGAGGCGTG  
 TGGGAGCATCACGATCGCGCGCGTIGAGTTGGGGTTCAACCCGGCGACCTGCGGGACGTGGGTATGGAAG  
 GCCGGCCTGCGCAGCCAGGGGAAAACCGGGACTGGTCCGCATCCAGGAAAGGAACGCTACTTCCAGTTGC  
 GACGCGATGGCATCTCGCGTCGCGAAGCAGCGGCTGCCGTGGGGTGAACATCCGCACGGCACGGGATTG  
 GGATAACGGTGTCCGGAAGACCGCTCATCGCCGCTATTACCCAGATGGTCCGGTTCGTCGATTACAAAACA  
 GGT **ATG** ACG ACG TTT CTT GAC GGC ACC GAG ACA ATC TCG CCG GCG GCG ATC  
 M T T F L D G T E T I S P A A I  
 TTT CAG CTG GAG AGG AAG CTC GAT CCG CGG TTC CTT TCG CTG GAG GAA CGT  
 F Q L E R K L D P R F L S L E E R  
 GAG CAG ATC CGG GAT CTC CTC GCG GAT GGG TTG TCA CTG CGG AGC ATC GCC  
 E Q I R D L L R D G L S L R S I A  
 GCC CAG CTG CGG CGG TCG CCA TCC ACG ATC AGT CGG GAA ATC TCC CGG AAC  
 A Q L R R S P S T I S R E I S R N  
 CGG TCC TCG ACC GGG ATC TAT CAC CCC TTC GCA GCA CAT CGC TAC TCG GCG  
 R S S T G I Y H P F A A H R Y S A  
 AAG CGT CGC CCA CGG CCA AAG CCG CGA AGA CTG GTG ACA GAG CTG CGG TTG  
 K R R P R P K P R R L V T E L R L  
 CGT GCT TTC GTT GAG TCG AAG CTG GCG TTG CGG TGG TCT CCC GAG CAG ATC  
 R A F V E S K L A L R W S P E Q I  
 ACT CGA GCC CTG ATC CGT CAG TTC CCG GAC GAC GTT GGG ATG CGA GTG GCG  
 T R A L I R Q F P D D V G M R V A  
 ACC GAG ACG ATC TAC CAG ACG CTC TAT CTC CAA GGA CGC GGC CAG CTG CGC  
 T E T I Y Q T L Y L Q G R G Q L R  
 CGT GAT CTC GCG ACA GCG CTG CGT ACC GGG CGC GCA CGT CGC CGA CCG AAC  
 R D L A T A L R T G R A R R R P N  
 CGG GGA ACC AAC GCA CGT CGT TCG CGG TTC GTC GAC CCG ATG CTC ATG ATC  
 R G T N A R R S R F V D P M L M I  
 TCC GAG CGC CCC GCT GAG GTC GCT GAT GGT GCT GTT CCA GGG CAT TGG GAA  
 S E R P A E V A D R A V P G H **W** **E**  
 GGC GAT CTC ATC ATC GGC GCT GAC CAC GCC AGC GCG ATC GGC ACC CTC GTC  
 G **D** **L** I I G A D H A S A I G T L V  
 GAG CGA ACC ACC AGG TTC GTG ATG CTC GTC CAC CTC CCG ACC GAC CAC GCT  
 E R T T R F V M L V H L P T D H A  
 GCC GAG ACC GTC CGC GAT GGC CTC ATT CGG ACG ATG AGC GGC CTG CCG GCC  
 A E T V R D G L I R T M S G L P A  
 GAA CTG AAG AAG TCG CTG ACC TGG GAC CAG GGT GCG GAG ATG GCC GCC CAC  
 E L K K S L T W D Q **G** A **E** **M** **A** A H  
 AAG ACG TTC ACG ATC GCC ACC GAC ATG GAC GTC TAC TTC TGC GAC CCA GCC  
 K T F T I A T D M D V Y F C D P A  
 TCG CCC TGG CAG CGC GGT TCT AAC GAG AAC ACG AAC GGG TTG CTG AGG CAG  
 S **E** **W** **Q** **R** G S **N** **E** N T **N** G L **L** **R** Q  
 TAC TTC CCG AAG GGC ACC GAC CTC TCA CAG CAC TCG CCC GCG GAC CTT GCC  
 Y F P K G T D L S Q H S P A D L A  
 CGA GTC GCA CAC GAA CTC AAC ACC CGC CCA CGC AAA ACG CTC GGC TGG GAA  
 R V A H E L N T R P R K T L G W E  
 ACC CCA GCC CAG CGC CTC GCT AAA CTA CCT ACC AGC **TAA** TCGTCC**TGTTGCAACGA**  
 T P A Q R L A K L P T S  
**CGACTAGAATCCGCC**  
 (CACCGGCCGGGCCTTIGCCG)

**Sequence 4. ISLxc3 (1,511 bp).** (a) In between parenthesis: adjacent sequences of one copy (23<sup>o</sup> occurrence – additional file 3); (b) letters highlighted in green and non complementary nucleotides highlighted in yellow: IR; (c) letters in red: transposase start and end; (d) letters beneath nucleotide sequence separated in triads: transposase coding sequence; (e) letters within rectangles: DDE motif and other conserved amino acids of IS30 family.

# ISLxc4

(CAGCCGACGCCCCCTTGACA)  
**GGGTGGGTTCTAACAGTGGTCGCAACAC**CGGCTAGTTTCGGGAGTTGTTATGACACTTGTAAAGGACGTCC  
 CAGAAGATGACCGGGCCGGCACCGATGTCGGCCGAGCGTGCATGATATATCGAGTTGTGGCGGCAGGGA  
**ATG** AAC ACC TCC GAG ATC TGC CGG ATG CTC GGG ATT CGC CGC AAG CTG GGC  
 M N T S E I C R M L G I R R K L G  
 AAC AAC TGG CGG AAC GGG TGG AAA CAT CGC GAC CTG GTC ACG GGC AAA GTG  
 N N W R N G W K H R D L V T G K V  
 CGT TAC TAT CCG CCG ATC GAT GAG GTT CCG GTG GTG ACG ACG GTC TCG GCC  
 R Y Y P P I D E V P V V T T V S A  
 CGG TTC TTA TCG GAG GAC GAG CGG GTG **AGG ATC GCC GAC CAA CTC AGG ACG**  
 R F L S E D E R V R I A D Q L R T  
**GGC GCG AGC ATC CGC AGT ATC GCA GGC GAC CTG GGA CGA GCA CCG TCG ACA**  
 G A S I R S I A A D L G R A P S T  
**ATC AGC CGG GAA GTG CGC CGC AAT CGC GGG ATC ACT GGG G AAG TAT CGA CCG**  
 I S R E V R R N R G I T G K Y R P  
**TTC CAT GCG CAC CGG CTC GCG AGG AGT CGC CGT GCC CGT GAC CGG CCG GGG**  
 F H A H R L A R S R R A R D R P G  
**AAG ATC GCC TCC AAC CCC CGA TTG CAG CAG GAG ATC CGT GGG CTG TTG AAG**  
 K I A S N P R L Q Q E I R G L L K  
**AAG TAT TGG AGT CCC GTT CAG ATC TGT CAG CAC CTG CGT CAG CAG CAT CCT**  
 K Y W S P V Q I C Q H L R Q Q H P  
**GAC GAT CCG AGC ATG CGC GTG GTG CAT GAG ACG ATT TAC CGC GAC CTC TAC**  
 D D P S M R V V H E T I Y R D L Y  
**GAC TAC CGC GGC GGC GCA CTC CCG CGC GAA CTC TGC CGA ATG CTG CGC ACC**  
 D Y R G G A L P R E L C R M L R T  
**AAA** CGC GAC AGA CGC AAA GCA CCC CGC GTG ATC GCC CGG CGC AGG ATC CGA  
 K R D R R K A P R V I A R R R I R  
 TTC AAC GCT GCG CTC ACG ATC CAT GAC CGT CCG TTC GCG CCC ACG GAC CGC  
 F N A A L T I H D R P F A P T D C R  
 AGC GTC CCC GGA GCC TGG GAA GGC GAC CTC ATC ATG GGG CTC GGC AAC CGT  
 S V P G A **W E G D L** I M G L G N R  
 TCG GCG ATT GCC ACA CTC GTC GAG CGA ACG ACC CGG TTC ACT CTC CTG TTG  
 S A I A T L V E R T T R F T L L L  
 CCT GTT GAC GCT GTC AAC AGA TCC GAG AGC CTC CGC GAT CAG CTC GTC CCT  
 P V D A V N R S E S L R D Q L V P  
 GCT CTC GCG GCG CTC CCG CCC GAA CTA CGC CGC TCA ATC ACC TGG GAC CAG  
 A L A A L P P E L R R S I **T W D** Q  
 GGC TGG GAA ATG GCG AGA CAT GAA GAG ATC AGC CGC GCA ACA GGA ACG AGA  
**G W E M A** R H E E I S R A T G T R  
 ATC TAC TCC TGC GAC CCG CAC TCG CCC TGG CAG CGC GGC AGC AAC GAG AAC  
 I Y S C D **E H S P W Q R** G S **N E** N  
 ACG AAT CGG CTC TTG CGG GAC TAC TTC CCC AAA CGC ACC GAC CTC AGA ACA  
 T **N** R L **L R** D Y F P K R T D L R T  
 CAC ACC CCG AAA GAG CTC GCC CTC GTC GCC GCC GAA CTC AAC AAC CGA CCC  
 H T P K E L A L V A A E L N N R P  
 CGC AAA ATC CTC GGC TGG AAG ACC CCG AAC ACC CTC TTC **ACT ACG CTG CTA**  
 R K I L G W K T P N T L F T T L L  
**GAA CAA ACA CAC CAT CCA TGA GTGTTGCGACCACTGTTAGAACCCACCC**  
 E Q T H H P  
 (AGCCGATACAGGAACGCCGC)

**Sequence 5. ISLxc4 (1,311 bp version).** (a) In between parenthesis: adjacent sequences of one copy (2<sup>o</sup> occurrence – additional file 3); (b) letters highlighted in green: IR; (c) letters in red: transposase start and end; (d) letters beneath nucleotide sequence separated in triads: transposase coding sequence; (e) letters highlighted in brown: purine rich region possible associated with +1 frameshifting; (f) letters in boldface: missing sequences of ISLxc4 smaller version (ISLxc4d1 - 896 bp long); (g) letters within rectangles: DDE motif and conserved amino acids of IS30 family.
