# Supplementary material for: Characterization of new IS elements and studies of their dispersion in two subspecies of Leifsonia xyli
Source: PubMed Central journal article supplement (PMC2516522; doi:10.1186/1471-2180-8-127), 2008-07-25
Supplement: 1471-2180-8-127-S3.pdf [file 1471-2180-8-127-S3.pdf]

**Additional file 3 - Mapping of *Lxx* (gray lines) and *Lxc* (white lines) IS elements within the *Lxx* genome based on their flanking sequences.**

| Occurrences of <i>Lxx</i> ISs <sup>a</sup> |               | Position within <i>Lxx</i> (bp) | Occurrences of <i>Lxc</i> ISs <sup>b</sup> | Nearby ORFs <sup>c</sup> | Nearby ORFs (truncated) | Within ORFs                                           |
|--------------------------------------------|---------------|---------------------------------|--------------------------------------------|--------------------------|-------------------------|-------------------------------------------------------|
|                                            |               | 17,349                          | 1<br>(EU599582)                            | <i>IS1237</i>            | Lxx00170                |                                                       |
|                                            |               | 17,351                          |                                            |                          | -                       |                                                       |
| 1                                          | <i>ISLxx4</i> | 35,438                          |                                            |                          | Lxx00340                |                                                       |
|                                            |               | 36,559                          |                                            |                          | -                       |                                                       |
| 2                                          | <i>ISLxx4</i> | 43,601                          |                                            |                          | Lxx00410                |                                                       |
|                                            |               | 44,725                          |                                            |                          | -                       |                                                       |
| 3                                          | <i>ISLxx5</i> | 56,859                          |                                            |                          |                         | alpha-mannosidase                                     |
|                                            |               | 58,353                          |                                            |                          |                         |                                                       |
|                                            |               | 116,376                         | 2<br>(EU599583)                            | <i>ISLxc4</i>            | -                       |                                                       |
|                                            |               | 116,430                         |                                            |                          | Lxx01180                |                                                       |
| 4                                          | <i>ISLxx4</i> | 155,914                         |                                            |                          |                         | aryl-alcohol dehydrogenase                            |
|                                            |               | 157,035                         |                                            |                          | Lxx01600                |                                                       |
|                                            |               | 171,771                         | 3<br>(EU599584)                            | <i>IS1237</i>            | Lxx01750                |                                                       |
|                                            |               | 171,778                         |                                            |                          | Lxx01760                |                                                       |
|                                            |               | 181,542                         | 4<br>(EU599585)                            | <i>IS1237</i>            |                         | lipopolysaccharide<br>modification<br>acyltransferase |
|                                            |               | 181,547                         |                                            |                          |                         |                                                       |
|                                            |               | 216,628                         | 5<br>(EU599586)                            | <i>ISLxc2</i>            | -                       |                                                       |
|                                            |               | 216,734                         |                                            |                          | Lxx02170                |                                                       |
| 5                                          | <i>ISLxx1</i> | 227,275                         |                                            |                          | Lxx02260                |                                                       |
|                                            |               | 229,479                         |                                            |                          | Lxx02300                |                                                       |
| 6                                          | <i>ISLxx4</i> | 243,212                         |                                            |                          | Lxx02440                |                                                       |

|    |               |         |                |               |                    |                                   |
|----|---------------|---------|----------------|---------------|--------------------|-----------------------------------|
| 7  | <i>ISLxx2</i> | 244,333 |                |               | Lxx02460           |                                   |
|    |               | 376,418 |                |               | Lxx03695           |                                   |
|    |               | 377,844 |                |               | Lxx03710           |                                   |
| 8  | <i>ISLxx4</i> | 384,404 |                |               | Lxx03780           |                                   |
|    |               | 385,525 |                |               | -                  |                                   |
| 9  | <i>ISLxx1</i> | 397,016 |                |               | Lxx03920           |                                   |
|    |               | 399,220 |                |               | Lxx03960           |                                   |
| 10 | <i>ISLxx4</i> | 417,654 |                |               | Lxx04140           |                                   |
|    |               | 418,775 |                |               |                    | multidrug efflux membrane protein |
| 11 | <i>ISLxx4</i> | 433,066 |                |               | Lxx04280           |                                   |
| 12 | <i>ISLxx5</i> | 434,187 |                |               | (12) <i>ISLxx5</i> |                                   |
|    |               | 434,614 |                |               | (11) <i>ISLxx4</i> |                                   |
|    |               | 436,102 |                |               | Lxx04330           |                                   |
| 13 | <i>ISLxx4</i> | 450,313 | 6              | <i>IS1237</i> | -                  |                                   |
|    |               | 450,415 | (EU599587)     |               | Lxx04510           |                                   |
|    |               | 498,823 | 7              | <i>IS1237</i> | Lxx05010           |                                   |
|    |               | 498,826 | (EU599588)     |               | -                  |                                   |
| 13 | <i>ISLxx4</i> | 528,020 |                |               |                    | secreted protein                  |
|    |               | 529,141 |                |               | Lxx05260           |                                   |
|    |               | 530,200 | 8 <sup>d</sup> | <i>ISLxc3</i> |                    | hypothetical protein              |
| 14 | <i>ISLxx5</i> | 546,996 | (EU599589)     |               | Lxx05410           |                                   |
|    |               | 548,490 |                |               | Lxx05440           |                                   |
| 15 | <i>ISLxx1</i> | 554,002 | 9              | <i>IS1237</i> |                    | conserved hypothetical protein    |
|    |               | 554,008 | (EU599590)     |               |                    |                                   |
|    |               | 559,179 |                |               | -                  |                                   |
| 16 | <i>ISLxx4</i> | 561,383 |                |               | Lxx05560           |                                   |
|    |               | 587,368 |                |               | Lxx05780           |                                   |
| 17 | <i>ISLxx5</i> | 588,489 |                |               | Lxx05800           |                                   |
|    |               | 605,317 |                |               | Lxx05935           |                                   |
|    |               | 606,811 |                |               | Lxx05970           |                                   |

|    |               |           |                               |               |          |                                   |                                                         |
|----|---------------|-----------|-------------------------------|---------------|----------|-----------------------------------|---------------------------------------------------------|
| 18 | <i>ISLxx4</i> | 630,853   |                               |               | Lxx06210 |                                   |                                                         |
|    |               | 631,974   |                               |               | Lxx06230 |                                   |                                                         |
| 19 | <i>ISLxx4</i> | 682,147   |                               |               | Lxx06840 |                                   |                                                         |
|    |               | 683,268   |                               |               |          | anthranilate synthase component I |                                                         |
|    |               | 724,434   | 10<br>(EU599591)              | <i>IS1237</i> |          |                                   | phosphonoacetaldehyde hydrolase                         |
| 20 | <i>ISLxx4</i> | 756,491   |                               |               | Lxx07550 |                                   |                                                         |
|    |               | 757,612   |                               |               | Lxx07580 |                                   |                                                         |
| 21 | <i>ISLxx5</i> | 781,015   |                               |               | Lxx07755 |                                   |                                                         |
|    |               | 782,417   |                               |               | -        |                                   |                                                         |
|    |               | 842,498   | 11_12<br>(EU599592)           | <i>ISLxc1</i> |          |                                   | apolipoprotein N-acyltransferase (11) <i>ISLxc1</i>     |
|    |               | 842,503   |                               | <i>IS1237</i> |          |                                   |                                                         |
|    |               |           |                               | <i>ISLxc1</i> |          |                                   | apolipoprotein N-acyltransferase secreted hydrolase     |
| 22 | <i>ISLxx4</i> | 854,883   |                               |               |          |                                   |                                                         |
|    |               | 856,004   |                               |               |          |                                   |                                                         |
|    |               | 890,622   | 13<br>(EU599593)              | <i>ISLxc2</i> | -        |                                   |                                                         |
|    |               | 890,626   |                               |               | Lxx08790 |                                   |                                                         |
| 23 | <i>ISLxx5</i> | 961,583   |                               |               |          |                                   | two-component system, sensor protein                    |
|    |               | 963,074   |                               |               |          |                                   |                                                         |
| 24 | <i>ISLxx4</i> | 974,255   |                               |               |          |                                   | ABC-type glycine betaine transport, ATP-binding protein |
|    |               | 975,376   |                               |               |          |                                   |                                                         |
|    |               | 977,879   | 14 <sup>d</sup><br>(EU599594) | <i>ISLxc2</i> |          |                                   | ABC-type glycine betaine transport, permease protein    |
|    |               | 978,033   | 15 <sup>d</sup><br>(EU599595) | <i>ISLxc2</i> | Lxx09540 |                                   |                                                         |
| 25 | <i>ISLxx5</i> | 1,028,083 |                               |               |          |                                   | proton/glutamate transport protein                      |
|    |               | 1,029,577 |                               |               | Lxx10080 |                                   |                                                         |

|    |               |           |            |                     |                      |                                                                     |
|----|---------------|-----------|------------|---------------------|----------------------|---------------------------------------------------------------------|
|    |               | 1,088,236 | 16         | <i>ISLxc3</i>       | Lxx10600             |                                                                     |
|    |               | 1,089,312 | (EU599596) |                     | Lxx10620             |                                                                     |
|    |               | 1,156,267 | 17_18      | <i>ISLxc2</i>       | Lxx 11300            |                                                                     |
|    |               | 1,156,310 | (EU599597) | <i>IS1237</i>       |                      | (17) <i>ISLxc2</i>                                                  |
|    |               | 1,167,239 | 19         | <i>ISLxc2</i>       | Lxx11310             |                                                                     |
|    |               | 1,167,301 | (EU599598) | <i>ISLxc4</i><br>d1 | Lxx11360<br>Lxx11370 |                                                                     |
| 26 | <i>ISLxx4</i> | 1,220,958 |            |                     | Lxx11850             |                                                                     |
|    |               | 1,222,079 |            |                     | Lxx11870             |                                                                     |
|    |               | 1,278,129 | 20         | <i>IS1237</i>       |                      | ABC-type glycine betaine<br>transport, substrate-binding<br>protein |
|    |               | 1,278,131 | (EU599599) |                     |                      | branched-chain amino acid<br>aminotransferase                       |
| 27 | <i>ISLxx4</i> | 1,294,415 |            |                     |                      |                                                                     |
|    |               | 1,295,536 |            |                     |                      |                                                                     |
| 28 | <i>ISLxx2</i> | 1,351,723 |            |                     | Lxx12960             |                                                                     |
|    |               | 1,353,149 |            |                     | Lxx12980             |                                                                     |
| 29 | <i>ISLxx4</i> | 1,399,152 |            |                     | Lxx13462             |                                                                     |
|    |               | 1,400,273 |            |                     | Lxx13465             |                                                                     |
|    |               | 1,418,384 | 21         | <i>IS1237</i>       |                      | hypothetical protein                                                |
|    |               |           | (EU599600) |                     |                      |                                                                     |
| 30 | <i>ISLxx5</i> | 1,425,659 |            |                     |                      | two-component system,<br>sensor protein                             |
|    |               | 1,427,147 |            |                     | -                    |                                                                     |
| 31 | <i>ISLxx2</i> | 1,428,339 |            |                     | Lxx13775             |                                                                     |
|    |               | 1,429,765 |            |                     | Lxx13790             |                                                                     |
| 32 | <i>ISLxx3</i> | 1,430,731 |            |                     | Lxx13800             |                                                                     |
|    |               | 1,433,367 |            |                     | Lxx13830             |                                                                     |
| 33 | <i>ISLxx4</i> | 1,473,991 |            |                     |                      | potassium channel beta<br>chain                                     |
|    |               | 1,475,112 |            |                     |                      |                                                                     |
| 34 | <i>ISLxx5</i> | 1,489,298 |            |                     | Lxx14410             |                                                                     |
|    |               | 1,490,792 |            |                     | (35) <i>ISLxx4</i>   |                                                                     |

|    |               |                        |                     |                                |                                |                                               |                                                 |
|----|---------------|------------------------|---------------------|--------------------------------|--------------------------------|-----------------------------------------------|-------------------------------------------------|
| 35 | <i>ISLxx4</i> | 1,491,321<br>1,492,442 |                     |                                | (34) <i>ISLxx5</i><br>Lxx14450 |                                               |                                                 |
|    |               | 1,531,161<br>1,531,162 | 22<br>(EU599601)    | <i>ISLxc4</i><br>d1            |                                |                                               | DNA binding protein                             |
| 36 | <i>ISLxx4</i> | 1,532,184              |                     |                                |                                | branched-chain amino acid<br>aminotransferase |                                                 |
|    |               | 1,533,305              |                     |                                | Lxx14750                       |                                               |                                                 |
| 37 | <i>ISLxx5</i> | 1,550,628<br>1,552,122 |                     |                                | Lxx14920<br>Lxx14940           |                                               |                                                 |
|    |               | 1,553,467<br>1,553,479 | 23<br>(EU599602)    | <i>ISLxc3</i>                  | Lxx14940                       |                                               | signal recognition particle,<br>subunit SRP54   |
| 38 | <i>ISLxx5</i> | 1,644,072<br>1,645,566 |                     |                                | Lxx15800<br>-                  |                                               |                                                 |
| 39 | <i>ISLxx4</i> | 1,665,988<br>1,667,109 |                     |                                | Lxx16000<br>Lxx16020           |                                               |                                                 |
|    |               | 1,701,440<br>1,701,452 | 24<br>(EU599603)    | <i>IS1237</i>                  | -<br>Lxx16360                  |                                               |                                                 |
|    |               | 1,763,557              | 25<br>(EU599604)    | <i>ISLxc2</i>                  | Lxx16970                       |                                               |                                                 |
| 40 | <i>ISLxx4</i> | 1,795,008<br>1,796,129 |                     |                                | Lxx17280<br>Lxx17290           |                                               |                                                 |
|    |               | 1,807,426              | 26<br>(EU599605)    | <i>IS1237</i><br>d1            |                                |                                               | sugar ABC transporter,<br>sugar-binding protein |
|    |               | 1,822,176<br>1,822,184 | 27<br>(EU599606)    | <i>IS1237</i>                  | Lxx17530                       |                                               |                                                 |
|    |               | 1,833,001              | 28_29<br>(EU599607) | <i>ISLxc2</i><br><i>IS1237</i> | Lxx17640                       | serine protease                               |                                                 |
|    |               | 1,866,921              | 30                  | <i>ISLxc2</i>                  | Lxx17650                       |                                               | (28) <i>ISLxc2</i>                              |
|    |               | 1,866,923              | (EU599608)          | <i>IS1237</i>                  | Lxx18010                       |                                               |                                                 |
|    |               | 1,917,885              | 31<br>(EU599609)    | <i>IS1237</i>                  | -                              | siderophore binding protein                   |                                                 |

|    |               |           |                  |               |                    |                                           |
|----|---------------|-----------|------------------|---------------|--------------------|-------------------------------------------|
|    |               | 1,929,362 | 32<br>(EU599610) | <i>ISLxc2</i> |                    | transcriptional regulator,<br>LuxR family |
| 41 | <i>ISLxx5</i> | 1,937,155 |                  |               | Lxx18750           |                                           |
|    |               | 1,938,643 |                  |               | Lxx18770           |                                           |
|    |               | 2,006,777 | 33               | <i>IS1237</i> | -                  |                                           |
|    |               | 2,006,927 | (EU599611)       | d1            | Lxx19480           |                                           |
|    |               | 2,061,997 | 34               | <i>ISLxc2</i> | -                  |                                           |
|    |               |           | (EU599612)       |               |                    |                                           |
|    |               | 2,086,080 | 35               | <i>ISLxc3</i> |                    | glycosyltransferase                       |
|    |               |           | (EU599613)       |               |                    |                                           |
| 42 | <i>ISLxx5</i> | 2,108,451 |                  |               |                    | conserved hypothetical<br>protein         |
|    |               | 2,109,945 |                  |               |                    |                                           |
| 43 | <i>ISLxx4</i> | 2,110,372 |                  |               | (42) <i>ISLxx5</i> |                                           |
|    |               | 2,111,493 |                  |               | Lxx20630           |                                           |
| 44 | <i>ISLxx5</i> | 2,172,361 |                  |               | Lxx21150           |                                           |
|    |               | 2,173,855 |                  |               | Lxx21170           |                                           |
|    |               | 2,189,585 | 36               | <i>ISLxc3</i> | Lxx21270           |                                           |
|    |               |           | (EU599614)       |               |                    |                                           |
| 45 | <i>ISLxx4</i> | 2,199,729 |                  |               | Lxx21360           |                                           |
|    |               | 2,200,850 |                  |               | Lxx21380           |                                           |
|    |               | 2,228,800 | 37               | <i>ISLxc2</i> | -                  |                                           |
|    |               |           | (EU599615)       |               |                    |                                           |
|    |               | 2,228,803 | 38 <sup>d</sup>  | <i>ISLxc2</i> | -                  |                                           |
|    |               |           | (EU599616)       |               |                    |                                           |
|    |               | 2,229,709 | 39               | <i>ISLxc3</i> |                    | conserved hypothetical<br>protein         |
|    |               | 2,229,814 | (EU599617)       |               |                    |                                           |
| 46 | <i>ISLxx6</i> | 2,305,178 |                  |               | Lxx22380           |                                           |
|    |               | 2,306,096 |                  |               | Lxx22400           |                                           |
| 47 | <i>ISLxx2</i> | 2,310,916 |                  |               | Lxx22520           | two-component system,<br>sensor protein   |
|    |               | 2,312,342 |                  |               |                    |                                           |
| 48 | <i>ISLxx5</i> | 2,322,399 |                  |               | Lxx22678           |                                           |
|    |               | 2,323,893 |                  |               | Lxx22708           |                                           |

|    |               |                        |                  |               |                                   |                                           |
|----|---------------|------------------------|------------------|---------------|-----------------------------------|-------------------------------------------|
|    |               | 2,339,753              | 40<br>(EU599618) | <i>IS1237</i> | conserved hypothetical<br>protein |                                           |
| 49 | <i>ISLxx1</i> | 2,340,215<br>2,342,419 |                  |               | -<br>Lxx22730                     |                                           |
| 50 | <i>ISLxx4</i> | 2,346,174<br>2,347,295 |                  |               |                                   |                                           |
|    |               | 2,445,558              | 41<br>(EU599619) | <i>ISLxc3</i> | Lxx23830                          |                                           |
|    |               | 2,481,361              | 42<br>(EU599620) | <i>ISLxc3</i> | Lxx24245                          |                                           |
| 51 | <i>ISLxx4</i> | 2,516,751<br>2,517,872 |                  |               |                                   | 5'-3' exonuclease                         |
|    |               | 2,546,454              | 43<br>(EU599621) | <i>ISLxc4</i> | -                                 |                                           |
|    |               | 2,565,053              | 44<br>(EU599622) | <i>IS1237</i> |                                   | transcriptional regulator,<br>GntR family |

<sup>a</sup> - IS elements of the same family are indicated by color: IS5 family - green; IS481 family - red; IS30 family – blue; IS21 family - gray; IS110 – orange.

<sup>b</sup> - Each occurrence of *ISLxc* is mapped on *Lxx* genome and the ID beneath are GenBank accession numbers of all flanking regions.

<sup>c</sup> - Ordered locus names as defined in the *Leifsonia xyli* subsp. *xyli* genome project –

<http://www.ncbi.nlm.nih.gov/sites/entrez?Db=genome&Cmd=ShowDetailView&TermToSearch=449>.

<sup>d</sup> – Occurrences 8, 14, 15 and 38 of *Lxc* have only one of the flanking sequences homologous to the *Lxx* genome and the other specific for the *Lxc* genome.
