# Supplementary material for: Characterization of new IS elements and studies of their dispersion in two subspecies of Leifsonia xyli
Source: PubMed Central journal article supplement (PMC2516522; doi:10.1186/1471-2180-8-127), 2008-07-25
Supplement: 1471-2180-8-127-S4.pdf [file 1471-2180-8-127-S4.pdf]

#### Additional file 4. IS elements inserted in specific fragments of *Lxc* genome

| Occurrences of <i>Lxc</i><br>IS elements <sup>a</sup> |                                | Nearby<br>ORFs | Within ORFs                                |
|-------------------------------------------------------|--------------------------------|----------------|--------------------------------------------|
| 45<br>(EU599623)                                      | <i>IS1237</i>                  |                | serine protease                            |
| 46<br>(EU599624)                                      | <i>ISLxc2</i>                  |                | citrate lyase beta chain                   |
| 47<br>(EU599625)                                      | <i>IS1237</i>                  |                | type I restriction-<br>modification        |
| 48<br>(EU599626)                                      | <i>IS1237</i>                  | -              |                                            |
| 49_50<br>(EU599627)                                   | <i>ISLxc2</i><br><i>IS1237</i> |                | hypothetical protein<br>(49) <i>ISLxc2</i> |
| 51<br>(EU599628)                                      | <i>IS1237</i>                  | -              |                                            |
| 52<br>(EU599629)                                      | <i>IS1237</i>                  | -              |                                            |
| 53<br>(EU599630)                                      | <i>ISLxc2</i>                  | -              |                                            |
| 54<br>(EU599631)                                      | <i>ISLxc2</i>                  | -              |                                            |
| 55<br>(EU599632)                                      | <i>ISLxc4</i><br>d1            | -              |                                            |
| 56<br>(EU599633)                                      | <i>ISLxc2</i>                  | -              |                                            |

<sup>a</sup> - IS elements of the same family are indicated by color: IS5 family - green; IS481 family - red; IS30 family – blue. The ID beneath are GenBank accession numbers of all flanking regions.
